# Supplementary material
Source: publisher figshare collection journal article supplement (https://karger.figshare.com/articles/dataset/_/25809211)
Supplement: Supplementary file 1 [file 1]

**Table S2.** Formulas to evaluate removal efficiency by NPs-supported blood purification therapies.

| **Type of Blood Purification** | ***In vitro* or**  ***in vivo*** | **Formulas** | **Author & year** |
| --- | --- | --- | --- |
| **Peritoneal dialysis or hemodialysis** | *In vitro* or  *in vivo* | **Reduction Rate (%) = [1 - (Cpost/Cpre)] × 100%**  Cpost and Cpre refer to post-dialysis and pre-dialysis concentrations of the solute essayed from the blood side respectively. | Shi, 2019 |
|  |  | **Total removal amount = Cpost × V**  Cpost refers to solute concentration in the recovered dialysate. V refers to the volume of the recovered dialysis media. |  |
| **Hemodialysis** | *In vitro* | **Fractional removal (%) = (Cdo × Qd) / (Cbi × Qb) × 100%.**  Cdo and Cbi refer to the solute concentrations in the dialysate outlet ports and blood inlet ports. Qd and Qb represent the flow rates of the dialysate and the simulated plasma solution, respectively. | Tao, 2016 |
| **Hemoadsorption** | *In vitro* or  *in vivo* | **Adsorption rate (%) = [1 - (Cpost/Cpre)] × 100%**  Cpost refers to the concentration of the solute after adsorption. Cpre refers to the initial concentration of the solute. | Xiang, 2017 |
